# Supplementary material for: Electrochemical hydrogen storage properties of a non-equilibrium Ti2Ni alloy
Source: Royal Society of Chemistry journal article supplement (doi:10.1039/c2ra00846g), 2012-01-01
Supplement: c2ra00846g.pdf [file c2ra00846g.pdf]

## Electronic Supplementary information (ESI)

### Electrochemical hydrogen storage properties of a non-equilibrium $\text{Ti}_2\text{Ni}$ alloy

Xiangyu Zhao, Yan Yao, Liqun Ma, Xiaodong Shen\*

*State Key Laboratory of Materials-Oriented Chemical Engineering, College of Materials Science and Engineering, Nanjing University of Technology, 5 Xinfofan Road, Nanjing 210009, PR China*

\* Corresponding author. Tel.: +86 25 83587234; fax: +86 25 83587260.

*E-mail address:* xdshen@njut.edu.cn (X. Shen)

(a)

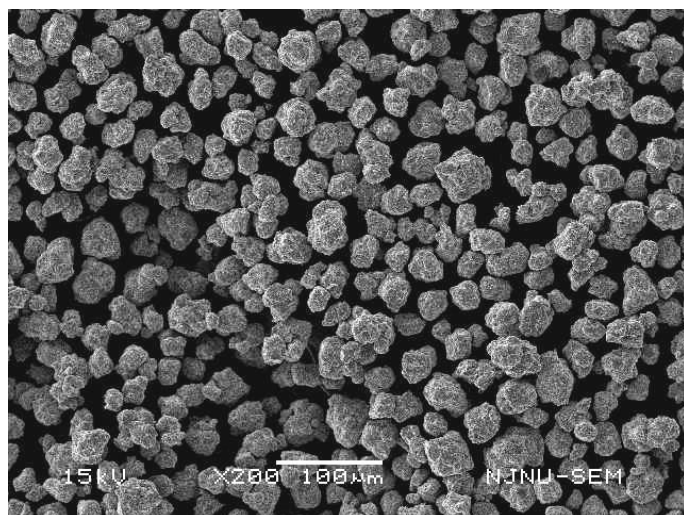

(b)

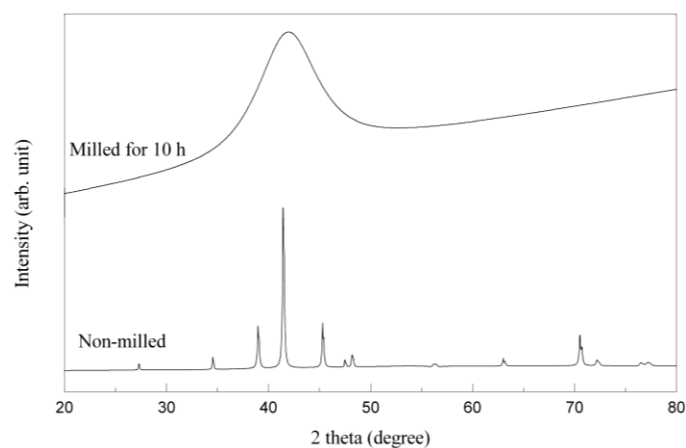

**Fig. S1. (a) SEM image of amorphous  $\text{Ti}_2\text{Ni}$  alloy and (b) XRD patterns of crystalline and amorphous  $\text{Ti}_2\text{Ni}$  alloys**

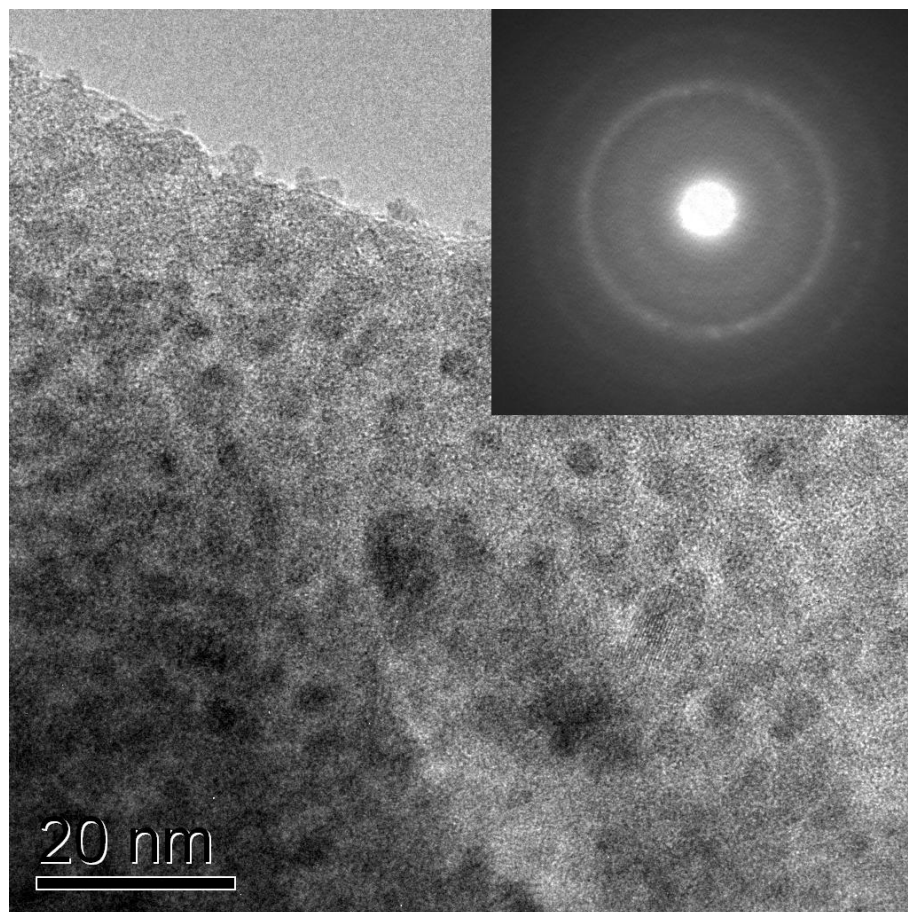

**Fig. S2.** The SEAD and HRTEM images of the non-equilibrium  $\text{Ti}_2\text{Ni}$  alloy
